# Supplementary material for: Correlations between structure, microstructure and ionic conductivity in (Gd,Sm)-doped ceria
Source: Royal Society of Chemistry journal article supplement (doi:10.1039/d2cp03255d), 2022-01-01
Supplement: d2cp03255d1.pdf [file d2cp03255d1.pdf]

Table 1 – Final agreement indexes:  $R_p$ ,  $R_{wp}$  and  $R_B$  are the profile, weighted profile and the Bragg factors, respectively.  $\chi^2$  is defined as the square of  $R_{wp}/R_{exp}$  ratio.

| Sample      | $R_p$ | $R_{wp}$ | $R_B$ | $\chi^2$ |
|-------------|-------|----------|-------|----------|
| Gd33Sm67_10 | 11.1  | 16.6     | 2.43  | 1.36     |
| Gd33Sm67_20 | 8.60  | 14.4     | 1.48  | 1.20     |
| Gd33Sm67_30 | 13.3  | 18.6     | 3.20  | 1.55     |
| Gd33Sm67_40 | 11.3  | 17.9     | 5.79  | 1.32     |
| Gd33Sm67_50 | 11.8  | 18.9     | 5.35  | 1.37     |
| Gd33Sm67_60 | 12.9  | 19.7     | 5.88  | 1.32     |
| Gd67Sm33_10 | 11.8  | 18.7     | 2.20  | 1.42     |
| Gd67Sm33_20 | 11.2  | 19.4     | 2.44  | 1.35     |
| Gd67Sm33_30 | 12.9  | 20.7     | 2.96  | 1.31     |
| Gd67Sm33_40 | 11.2  | 17.6     | 6.38  | 1.29     |
| Gd67Sm33_50 | 12.2  | 18.5     | 5.75  | 1.32     |
| Gd67Sm33_60 | 14.3  | 20.7     | 6.62  | 1.42     |

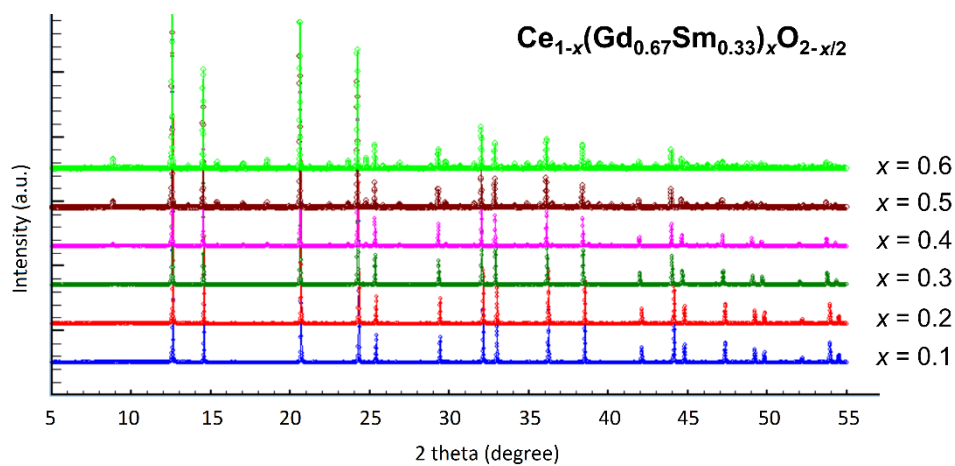

Figure 1 - Stacked diffractograms of samples belonging to the series  $Ce_{1-x}(Gd_{0.67}Sm_{0.33})_xO_{2-x/2}$ .

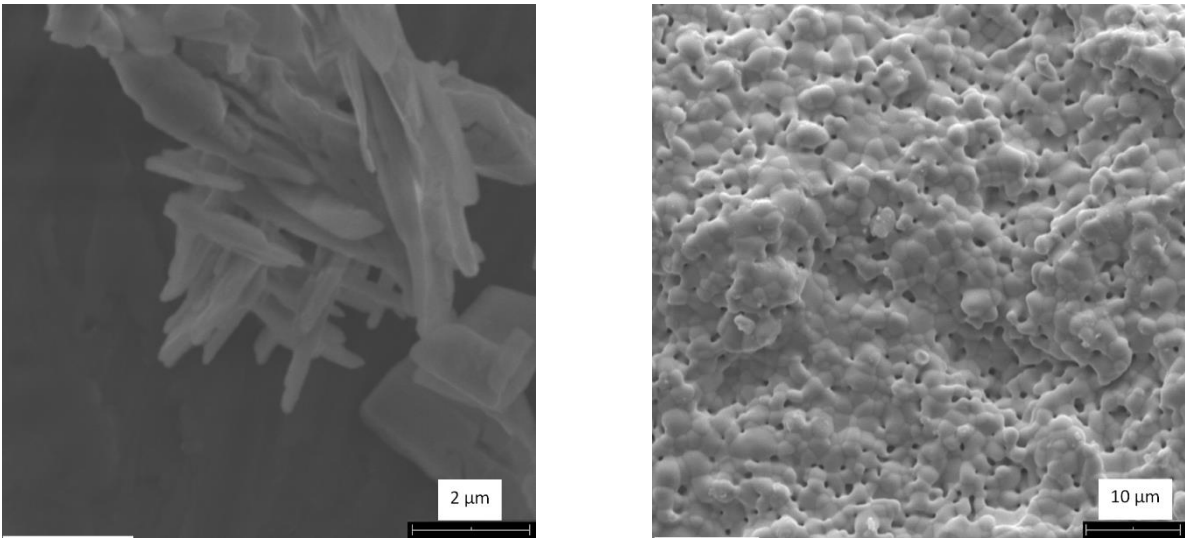

Figure 2 - Microphotograph taken by a) secondary electrons on powders of sample Gd67Sm33\_20 and b) backscattered electrons on sintered Gd67Sm33\_30.

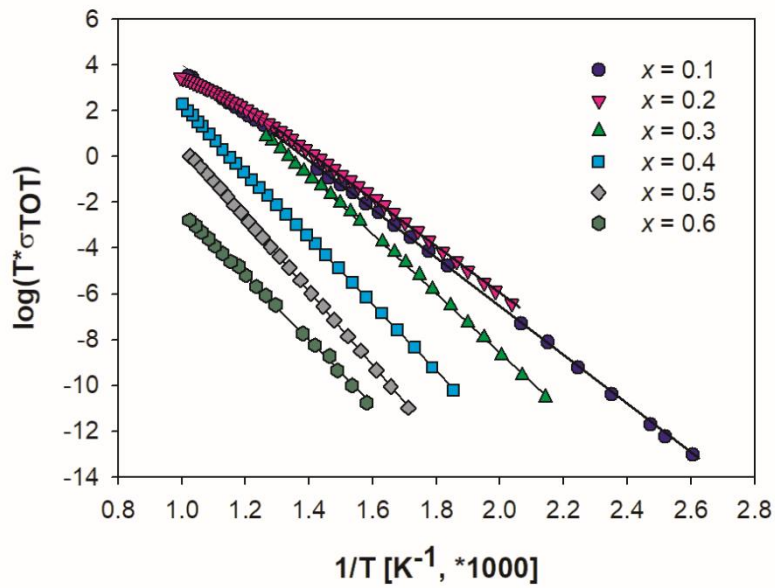

Figure 3 -  $\sigma$  Arrhenius plots for the  $\text{Ce}_{1-x}(\text{Gd}_{0.67}\text{Sm}_{0.33})_x\text{O}_{2-x/2}$  system. Solid lines linearly fit experimental data.
